RESEARCH ARTICLE

# Targeting Integrin-Dependent Adhesion and Signaling with 3-Arylquinoline and 3-Aryl-2-Quinolone Derivatives: A new Class of Integrin Antagonists

Sandrine Fiorucci<sup>1,2</sup>, Xiaochen Lin<sup>3</sup>, Karin Sadoul<sup>1,2</sup>, Guy Fournet<sup>4</sup>, Daniel Bouvard<sup>1,2</sup>, Olga Vinogradova<sup>3</sup>, Benoît Joseph<sup>4</sup>, Marc R. Block<sup>1,2\*</sup>

**1** Université Grenoble Alpes, Grenoble, France, **2** INSERM, Centre de recherche U823, Grenoble, France, **3** University of Connecticut, Storrs, United States of America, **4** Université Claude Bernard-Lyon 1, Lyon, France

\* [marc.block@ujf-grenoble.fr](mailto:marc.block@ujf-grenoble.fr)

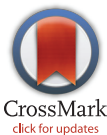

**OPEN ACCESS**

**Citation:** Fiorucci S, Lin X, Sadoul K, Fournet G, Bouvard D, Vinogradova O, et al. (2015) Targeting Integrin-Dependent Adhesion and Signaling with 3-Arylquinoline and 3-Aryl-2-Quinolone Derivatives: A new Class of Integrin Antagonists. *PLoS ONE* 10(10): e0141205. doi:10.1371/journal.pone.0141205

**Editor:** Guido Serini, Candiolo Cancer Institute, ITALY

**Received:** June 23, 2015

**Accepted:** September 24, 2015

**Published:** October 28, 2015

**Copyright:** © 2015 Fiorucci et al. This is an open access article distributed under the terms of the [Creative Commons Attribution License](https://creativecommons.org/licenses/by/4.0/), which permits unrestricted use, distribution, and reproduction in any medium, provided the original author and source are credited.

**Data Availability Statement:** All relevant data are within the paper and its Supporting Information files.

**Funding:** This work was supported by Fondation ARC, INSERM, CNRS, and Université Grenoble Alpes. CNRS and Fondation ARC gave a fellowship to SF. INSERM gave bench fees.

**Competing Interests:** The authors have declared that no competing interests exist.

## Abstract

We previously reported the anti-migratory function of 3-aryl-2-quinolone derivatives, chemically close to flavonoids (Joseph et al., 2002). Herein we show that 3-arylquinoline or 3-aryl-2-quinolone derivatives disrupt cell adhesion in a dose dependent and reversible manner yet antagonized by artificial integrin activation such as manganese. Relying on this anti-adhesive activity, a Structure-Activity Relationship (SAR) study was established on 20 different compounds to throw the bases of future optimization strategies. Active drugs efficiently inhibit platelet spreading, aggregation, and clot retraction, processes that rely on  $\alpha_{IIb}\beta_3$  integrin activation and clustering. *In vitro* these derivatives interfere with  $\beta_3$  cytoplasmic tail interaction with kindlin-2 in pull-down assays albeit little effect was observed with pure proteins suggesting that the drugs may block an alternative integrin activation process that may not be directly related to kindlin recruitment. *Ex vivo*, these drugs blunt integrin signaling assayed using focal adhesion kinase auto-phosphorylation as a read-out. Hence, 3-arylquinoline and 3-aryl-2-quinolone series are a novel class of integrin activation and signaling antagonists.

## Introduction

Many physiological and pathological processes are largely dependent on cell adhesion to the surrounding extracellular matrix (ECM) [1]. Integrins, the main cell adhesion receptors, are transmembrane, heterodimeric proteins composed of a large extracellular domain that interacts with specific ECM proteins and a short cytoplasmic tail which recruits a complex and dynamic platform of proteins involved in both signaling and mechanical functions.

Integrins are central regulators of cell fate and have raised a great interest as therapeutic targets [2–5]. So far many of the twenty four known integrin hetero-dimers have been targeted

due to their involvement in immunity [6], cancer [7], and processes such as platelet aggregation or angiogenesis [8]. On the other hand,  $\alpha_v\beta_3$  integrins [9] and  $\alpha_2/\alpha_5\beta_1$  [10] have recently been shown to bypass tyrosine kinase inhibitors treatments leading to resistances in cancer therapies. Some integrin inhibitors are undergoing late-stage clinical trials in cancer, inflammation, autoimmune disorders and thrombosis treatment. Most of integrin targeting compounds, including antagonist monoclonal antibodies, peptide derivatives and small molecule inhibitors, were designed on a ligand-based strategy. They mimic all or part of the binding domain of integrin substrates, often recognized through their RGD motif. Such molecules act as competitors and efficiently prevent integrin mediated cell attachment or platelet aggregation. Unfortunately though, they also act as partial agonists of integrin signaling [11], leading to significant side effects that have, so far, reduced the use of the related therapeutic strategies [12–14]. For platelets, the use of intravenous  $\alpha_{IIb}\beta_3$  antagonists has been superseded by the combination of aspirin and a P2Y<sub>12</sub> inhibitor due to decreased bleeding risk and lower cost. Finally, treatments with integrin antagonists often result in modification of the integrin expression pattern and drug resistance, hence putting forward the need of inhibitors with multiple targets [15].

Extracellular stimuli lead to a direct interaction between the  $\beta$ -integrin cytoplasmic tail and the FERM-like domain of talin, which is regarded as a major integrin activator [16, 17]. The interaction of integrin cytosolic domain with talin unclamps the complex between  $\alpha$  and  $\beta$  subunit tails [18, 19], triggering conformational changes along transmembrane and extracellular integrin domains. This rearrangement allows the shift between the integrin “low affinity state”, where the extracellular domain is folded toward the membrane resulting in access hindrance for extracellular ligands, to an extended, “high affinity state” where the interaction with the extracellular matrix is favored. However, talin alone is not sufficient to trigger full integrin activation. Kindlins can also interact directly with the integrin cytoplasmic tail through a FERM-like domain [20] on a NPxY motif distinct from the talin binding site and act as a talin cofactors required for effective integrin activation. Finally, it has recently been proposed that in platelets, talin triggers the switch to the high affinity state of  $\alpha_{IIb}\beta_3$  while kindlin-3 favors integrin clustering [21], a state leading to an irreversible aggregation.

Need to develop new strategies for integrin-based therapies with limited side effects will mainly rely on the design of antagonists that block both integrin/extracellular matrix interaction and integrin signaling. Consistent with this view, it has been recently reported that blocking the interaction between the integrin  $\alpha_4$  subunit and paxillin with a small membrane permeable molecule may be used in anti-inflammatory treatment [22]. This inhibition abrogates  $\alpha_4$ -integrin mediated responses in T-cells while maintaining integrin-independent responses.

Herein, we describe potent integrin inhibitors with a 3-arylquinoline or a 3-aryl-2-quinolone scaffold that inhibit integrin mediated cell adhesion and integrin signaling (See supplemental information section for structural description of the molecules). These compounds, that share similarities with flavonoids, were initially described as cell migration inhibitors [23]. Indeed, 3-aryl-2-quinoline BJINT006, the lead compound of this study, strongly impacted focal adhesions (FA) assembly and dynamics in a reversible and dose-dependent manner. Since platelet activation is a physiological process that is strictly dependent on the integrin  $\alpha_{IIb}\beta_3$  [24], platelets were treated with BJINT small molecules to assess their putative anti-thrombotic potential. As expected, the treated platelets showed impaired spreading and aggregation and were unable to trigger efficient clot retraction. Finally, *ex vivo*, these drugs blunt outside-in integrin signaling. Altogether, our results showed that 3-Arylquinoline and 3-aryl-2-quinolone derivatives are integrin antagonists that might be used for integrin based therapy such as anti-thrombotic agents.

## Materials and Methods

### Reagents and antibodies

Fibronectin was purified from bovine plasma as described previously [25], rat tail collagen I was purchased from Becton Dickinson (Pont-de-Claix, France), vitronectin from Life Science Invitrogen (Saint-Aubin, France) and fibrinogen from EMD Millipore (Molsheim, France). Poly-lysine was obtained from Sigma-Aldrich (L'isle-d'Abeau, France). Monoclonal antibodies raised against Kindlin-2 (clone 3A3) and talin (clone TA205) were purchased from EMD-Millipore.  $\beta_3$  integrin mAb was obtained from Emfret (Eibelstadt, Germany). Various Alexa-488 conjugated antibodies were obtained from Invitrogen and HRP-coupled antibodies from Biorad (Marnes-la-Coquette, France). Blebbistatin was purchased from EMD Millipore, TRITC-phalloidin and Thrombin from Sigma-Aldrich and collagen for platelet aggregation assays from Helena Biosciences.

### Plasmids and cell lines

Talin head was inserted in pDsRed C1 plasmid (Clontech, Saint-Germain-en-Laye, France) and transfected in pre-osteoblasts using Lipofectamine 2000 (Invitrogen) according to provider procedure. GFP-Kindlin-2 expressing pre-osteoblasts were obtained from newborn mice sacrificed by decapitation as previously described [26]. Kindlin<sup>fl/fl</sup> preosteoblasts were isolated from corresponding mouse strain generated by EMMA and transfected par ERT2Cre plasmid [27]. FAK<sup>-/-</sup> pre-osteoblasts were prepared from FAK<sup>fl/fl</sup> mice, immortalized with SV40 large T antigen followed by gene deletion after infection with adenoviruses expressing the Cre recombinase.

In France since February 2013, according to the European Directive 2010–63, research using animal models is subject to authorization from the Ministry of Research. Each project authorization includes ethics opinion issued by the ethics committee for animal experiments joined by the animal facility. The ethics committee of Grenoble, ComEth-Grenoble is registered with the National Committee of Reflection on Ethical Animal Experiments of the Ministry of Research under number 12 (CEEA No. 12). The main task of the committee is to issue reasoned opinion on the ethics of experimental projects proposed by the experimenters. The committee has validated this project

### Cell immunostaining

Cells were fixed with 4% PFA, platelets with 4% neutral formalin (Sigma-Aldrich). They were permeabilized with 0.2% Triton X100 in PBS and incubated with appropriate primary antibodies in PBS- supplemented with 10% goat serum- 0.1% Tween. After 3 washes, the coverslips were incubated with appropriate secondary antibodies. Cells were mounted in Mowiol solution and imaged on an inverted microscope (Axioimager, Carl Zeiss S.A.S., LePecq, France).

### Cell spreading assay

Cell adhesion was assayed as previously described (Yan, 2008). Briefly, 96-wells plates were coated with 5  $\mu\text{g}/\text{mL}$  of fibronectin overnight. Washed twice with PBS, the wells were then blocked in 1% BSA for 1 h at 37°C. Cells ( $1.10^4/\text{well}$ ) in suspension were incubated with or without BJINT molecule for half an hour at 37°C before being allowed to adhere for 30 min. Cells were washed with PBS and fixed in 10% methanol– 10% acetic acid before staining in 0.5% Crystal Violet (Sigma Aldrich)- 10% methanol for 10 min at room temperature. Wells were rinsed three times before dissolving the dye in 10% acetic acid at 37°C for 15 min.

Absorbance at 620 nm was read on an Anthos AD3405 plate reader (Beckman Coulter, Villepinte, France).

### Adhesion inhibition assay

The ability of 3-arylquinoline or 3-aryl-2-quinolone derivatives to detach spread cells was assayed by modifying the spreading assay protocol. Plates were coated as described above. Cells were allowed to spread for 1 h at 37°C then the medium was removed and replaced by medium containing the tested molecule at the desired concentration. Cells were treated for 1 h then washed before fixation and coloration as described above.

### Cell spreading on various substrates

Coverslips were coated either with 10 µg/mL fibronectin or vitronectin in PBS at 4°C overnight or with 20 µg/mL collagen for 1 h at 37°C in 0.2M acetic acid. The coated coverslips are then blocked with 1% BSA for 1 h at 4°C. Cells expressing GFP-kindlin-2 were incubated in PBS 5% BSA for 45 min at 37°C before being allowed to spread on the coated coverslips overnight in DMEM with 10% fibronectin free FCS. Medium is then replaced with medium containing the tested molecule or the corresponding volume of DMSO. The cells were incubated 1 h at 37°C before prior fixation.

### Spreading on poly-lysine versus fibronectin

Cells spread on fibronectin (integrin dependent) or poly-lysine (integrin independent) 35-mm-diameter cell culture dishes were coated overnight at 4°C with 10 µg/mL fibronectin or 100 µg/mL poly-lysine. Fibronectin coated dishes were then blocked with 1% BSA while poly-lysine coating was continued for 1 h at 37°C. Then the PLL coated dishes were dried for at least 3 hours before use. Cells were incubated in 5% BSA for 1 h at 37°C before being centrifuged and resuspended in DMEM with 10% fibronectin free FCS and allowed to spread on dishes for 2 h. Medium was then removed and replaced with DMEM with fibronectin free serum containing BJINT006 at 12.5 or 25 µM. Cells were incubated for 1 h at 37°C before fixation. Remaining cells were then manually counted on 15 microscope fields.

### Live/dead cell toxicity assays

Cells in D-MEM supplemented with 10% fetal calf serum were incubated with 50 µM of BJINT molecules or DMSO for 1 h at 37°C.  $10^6$  cells were centrifuged and washed two times with PBS then resuspended with 200 µL of PBS. Then 1 µL of freshly prepared 1 µM Calcein AM solution in PBS was added. Incubation was performed for 45 min at 37°C. Then 5 µL of propidium iodide solution (10 mg/mL) were added. After homogenization 0.5 mL of cold PBS was added and cells were immediately analyzed by FACS (FL1 vs FL3 channels).

### Preparation of human platelet-rich plasma (PRP) and Platelet-poor plasma (PPP)

Human platelet-rich plasma concentrates from anonymous donors were obtained from the French national blood bank, Grenoble Branch, and used accordingly to the European rules and approved by Grenoble University Ethical committee. Human PRP and PPP were prepared as previously described [28]. Briefly, non-therapeutic buffy coats were diluted with an equal volume of PBS and centrifuged 10 min at 400g at RT. The upper phase corresponding to the PRP was collected, and a part of the lower erythrocyte rich fraction is kept for the clot retraction

assay, as mentioned below. PPP was obtained by collecting the supernatant after centrifugation of PRP for 5 min at 2200g.

### Platelet spreading assay

Platelets resuspended in PBS were preincubated for 30 min with BJINT006 at the tested concentrations. A number of  $1.10^6$  platelets/well/400  $\mu$ L were then seeded into 24-wells plates containing fibrinogen- or collagen-coated coverslips, centrifuged (3 min, 600g, RT) and placed in an incubator for 30 min before fixation.

### Platelet aggregation assay

For aggregation assays PRP was adjusted to a platelet concentration of  $3 \times 10^8$ /mL with PPP and different concentrations of BJINT drugs or vehicle were added and preincubated for 30 min. Platelet aggregation was induced by adding 50  $\mu$ L of collagen (20  $\mu$ g/mL in 0.9% NaCl) or ADP (10  $\mu$ g/mL) to 150  $\mu$ L PRP and evaluated using an APACT 4004/LABiTec aggregometer.

### Clot retraction assay

PRP was adjusted to  $3 \times 10^8$  platelets/mL with PPP, 400  $\mu$ L were pipetted into an aggregation tube and 2  $\mu$ L of an erythrocyte rich fraction (see PRP preparation) was added for color contrast. After an initial 30 min incubation at 37°C coagulation was induced by adding 4  $\mu$ L of thrombin (20 U/mL, 0.1% BSA) and mixing with a plastic inoculation loop. After 10 min the clots were removed, and placed into new tubes containing 400  $\mu$ L PBS. Pictures were taken for visual inspection and the remaining extruded serum volume was measured for quantitative evaluation of clot retraction.

### Expression and purification

Cloning, expression, and purification the  $\beta_3$  cytoplasmic tail in non- and mono-phosphorylated forms have been described previously [18, 29]. To produce  $^{15}$ N-labeled proteins, cells were grown in M9 minimal medium containing  $^{15}$ NH<sub>4</sub>Cl (1.1 g/L) as the sole source of nitrogen. Expression of GST tagged  $\beta_1$ ,  $\beta_3$ , F2/F3 talin domain, or kindlin-2 FERM domains were purified by affinity on Glutathion-Sepharose 4B (GE healthcare). Biotinylation of purified proteins was carried out using EZ link NHS kit from ThermoScientific according to the manufacturer's instructions.

### Pull-down assays

GST  $\beta_1$  and  $\beta_3$  cytoplasmic tails were expressed in the BL21-CodonPlus-RIL E. coli strain. Bacteria were disrupted in a buffer made of 50 mM TRIS Cl pH 7.5, 1% (w:v) Triton X100; 150 mM NaCl, 5 mM MgCl<sub>2</sub>, 2 mM DTT and anti-protease mix (Roche) by sonication. The lysate was clarified by centrifugation at 14000 rpm in a JA20 rotor (Beckman) and used immediately or frozen in liquid nitrogen and stored at -80°C. Glutathione coupled Sepharose beads (160  $\mu$ L of bead suspension) were washed with the bacteria lysis buffer, mixed with 1 mL of bacterial lysate, and incubated overnight at 4°C. Beads were washed 3 times with cell lysis buffer and resuspended in 1 mL of this buffer before use.

Pre-osteoblast cells (90% confluent) expressing either GFP kindlin-2, or DsRed talin head in 10 cm Petri dishes were washed with 10mL/dish of cold PBS, then lysed by 1 mL/dish with cell lysis buffer (10 mM PIPES pH 6.8, NaCl 100 mM, Na<sub>2</sub>VO<sub>4</sub> 1 mM, Na<sub>2</sub>PO<sub>4</sub>·7H<sub>2</sub>O 50 mM, 0.1% (w:v) Deoxycholate, Sucrose 150 mM, 0.5% (w:v) Triton X100, anti-protease mix). The lysate was clarified by centrifugation at 13600 rpm for 15 min.

Beads and cell lysates were pre-incubated separately with 50 mM of BJINT derivatives or vehicle for 1 h with agitation at 4°C, then 250  $\mu$ L of bead suspension were mixed with 0.6 mL of cell lysate and incubation was continued for 4 h at 4°C. After 3 washes in cell lysis buffer the beads were drained and mixed with 15  $\mu$ L of Laemli sample buffer and elutes proteins were analysed by SDS-PAGE and Western blotting with anti kindlin or anti talin head primary antibodies.

## Solid phase binding assays

GST tagged recombinant proteins were expressed in the BL21-CodonPlus-RIL E. coli strain, purified on glutathione-Sepharose 4B beads according to classical procedures, frozen in liquid nitrogen, and stored at -80°C. GST  $\beta_1$  and  $\beta_3$  cytoplasmic tails were biotinylated using the EZlink SulfoNHS biotinylation kit (Thermo Scientific) according to the manufacturer instruction.

All stages were carried out at room temperature. 96 wells plates (Maxisorp Nunc) were coated with 100  $\mu$ L/well of 10  $\mu$ g/mL of GST, GST-talin-F2/F3 domain, or GST kindlin-2-FERM domain for 1 h. The wells were post coated with 200  $\mu$ L/well of PBS supplemented with 3% (w:v) BSA for another hour. Then GST- $\beta$  integrin tails in the cell lysis buffer (100  $\mu$ L/well) were introduced at increasing concentrations and let to incubate 1 h. After 3 washes with PBS (200  $\mu$ L/well), 100  $\mu$ L/well of streptavidin HRP ELISA grade (BioRad) in PBS 3% BSA were added and incubated for 1 h. Finally after 3 more washes with PBS, integrin tail detection was achieved using an ABTS solution (Vectastain) according to the manufacturer instructions and absorbance was measured at 405 nm. Coating with plain GST allowed us to determine the non-specific binding and this signal was subtracted from the signals obtained with GST-talin or GST-kindlin-2 domains. It is noteworthy that specific binding was only significant in the presence of non-ionic detergent.

## Results

### FA disassembly is triggered in a dose dependent and reversible manner by BJINT006 and BJINT011 compounds, but not by BJINT020

Integrins are important receptors involved in cell migration by orchestrating the clustering of proteins at or near the plasma membrane. We generated mesenchymal cell line (pre-osteoblasts) expressing an important integrin regulator, kindlin-2, fused to eGFP to dynamically monitor adhesive structures such as FAs or focal complexes. Immunofluorescence labeling using a monoclonal anti-kindlin-2 antibody recognizing both endogenous and exogenous kindlins shows a perfect co-localization, indicating that the distribution of both proteins was identical (S1 Fig). To improve FA assembly, the cells were seeded on fibronectin coated coverslips and allowed to spread for 90 minutes in presence of DMSO, the drug vehicle. Under these conditions the cells were nicely spread and displayed typical peripheral focal adhesions. However, addition of BJINT006 to the medium triggered cell rounding up at the lowest concentrations tested, along with a clear kindlin-2 delocalization from FAs (Fig 1A). Increasing the drug concentration finally resulted in a dose dependent cell detachment which was estimated using Crystal Violet staining as described under Materials and Methods. Similar results were observed using 3-aryl-2-quinolone BJINT 011 (Fig 1B), a closely related drug with the lateral side chain positioned differently on the molecule backbone, while in the absence of this lateral side chain on 3-aryl-2-quinolone BJINT020, the molecule exhibited no effect on cells even when used at the high concentration of 50  $\mu$ M (not shown). To rule out any possible artifacts due to drug toxicity, BJINT treated cells were subjected to Calcein AM/propidium iodide



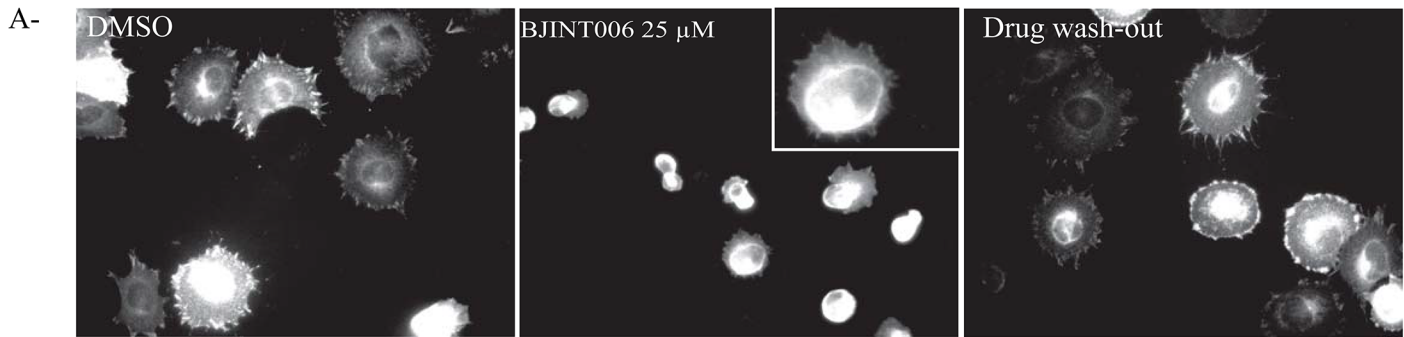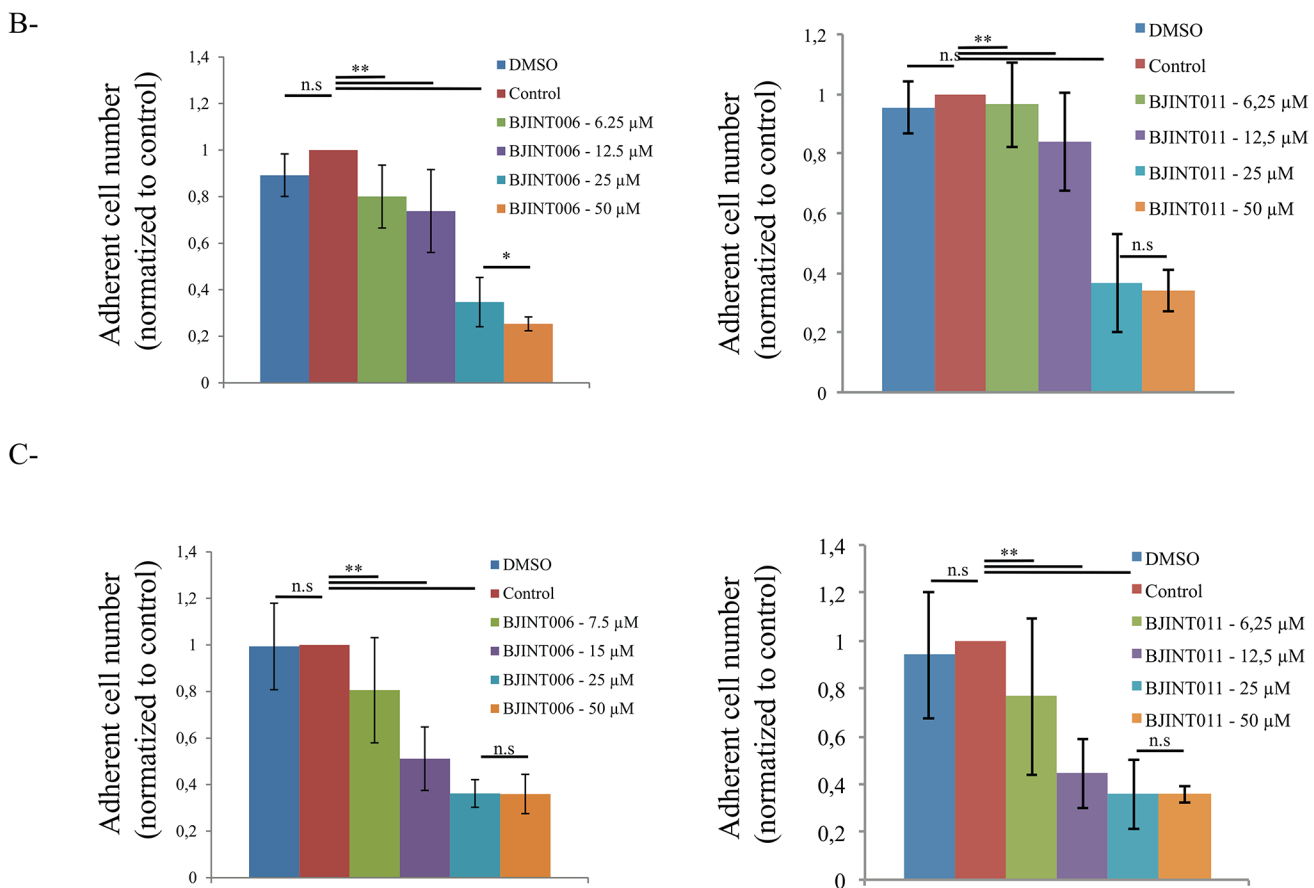

**Fig 1. BJINT derivatives promote focal adhesion disassembly and cell detachment in a reversible and dose dependent manner.** (A) Suppression of cell spreading under BJINT006 treatment. Pre-osteoblasts expressing GFPkindlin-2 were spread on fibronectin coated coverslips (5 μg/mL) for 1 h 30 at 37°C before adding the BJINT drugs and incubation was continued for 1 h. (left and central panels) Reversibility of BJINT006 after 1 hour drug wash-out (right panel). (B) Cells were treated with increasing BJINT006 and 011 concentrations and adhesion was compared to untreated cells (control) or cells treated with vehicle (DMSO). Cells were spread for 1h30, and then treated for 1h. After fixation, they were stained with Crystal Violet (0.5% w:v) and optical density was read at 620 nm. (C) Cells in suspension were treated for 1h at 37°C then let to attach and spread on fibronectin coated dishes for 1 h 30. They were compared to cells treated with vehicle (DMSO) or untreated (control). Adherent cell numbers were estimated as described above.

doi:10.1371/journal.pone.0141205.g001

staining. FACS analyses revealed that cell viability was better than 95% under all experimental conditions (S2 Fig).

Having shown that the molecules were able to interfere with focal adhesion stability we asked whether it could prevent cell adhesion. Cells were first incubated in suspension with increasing drug concentrations and then let to attach and spread for 90 minutes. Quantification of the number of cells attached to the plates indicated that the compounds 006 and 011 not only triggered FA disassembly but were also able to prevent their formation within the same concentration range (Fig 1C).

To assess whether the molecules action was irreversible or not, medium containing BJINT006 was removed and the cells were extensively washed before being allowed to spread for 1 hour. After the drug wash-out, the cells were able to assemble FAs again, showing that BJINT006 inhibitory activity was reversible and that the drug is likely nontoxic during the time course of incubation (Fig 1A). In addition we observed that the BJINT006 dependent inhibition of adhesion was independent of the ECM protein used to coat coverslips, since cell rounding up and detachment was also observed on either type I collagen or vitronectin (S3 Fig). This lack of specificity suggested that the drugs target a component or regulatory mechanism common to all adhesive structures, thus are likely to act intra-cellularly.

### The activity of BJINT family members is closely related to their structure

To address the structure-activity relationship of 3-arylquinoline and 3-aryl-2-quinolone derivatives, compounds with modifications on their lateral positions were synthesized according to the strategy described in (S4 Fig). Twenty different compounds were tested using the adhesion assay described above. It appeared that the presence of a tertiary amine on R3 is required for BJINT family members to impede cell adhesion (Fig 2). Higher steric occupation around the amine may alter molecule activity depending on the lateral chain attachment to the backbone. Modification of the lateral chain length has little effect on the compound activity whereas increasing chain rigidity (BJINT018) seems to impair its activity, as does the suppression of R<sub>1</sub> and R<sub>2</sub> methoxy- substitutions. Whether longer chains can be introduced at these positions has yet to be investigated. This opportunity may raise the perspective of coupling the molecule to a fluorochrome or another relevant tool to further study the activity of the compounds.

Therefore, further key experiments were carried out with BJINT006 and BJINT011 as active compounds and BJINT020 as negative control. The structural differences in these two active molecules allowed assessing the importance of the lateral chain positioning on the main backbone of the molecule.

### 3-Arylquinoline and 3-aryl-2-quinolone derivatives inhibit FA assembly independently on the integrin Src/FAK signaling axis and cell contractility

FA disassembly caused by 3-arylquinoline and 3-aryl-2-quinolone derivatives may be of direct or indirect nature. The effect due to impairment of function or recruitment of the structural components, such as integrin receptors themselves, or linkers to cytoskeleton, including talins, kindlins, vinculin, is considered direct. The indirect action might occur through the perturbation of integrin signaling pathways, which include the activation state of Src-family kinases. On SYF cells (lacking Src, Fyn and Yes expression) as well as on FAK<sup>-/-</sup> immortalized pre-osteoblasts, addition of BJINT 006 resulted in cell detachment (Fig 3A). This rules out any indirect effect in the drug action relying on FAK and Src-family kinases, two major actors in integrin signaling.

Along with adhesive structures, the actin cytoskeleton and cell contractility machinery are key players of cell migration [30]. Reciprocally, cell contractility dramatically impacts on adhesive structure assembly and patterning. To test whether BJINT006 adhesion inhibition depends on contractility, we treated GFP-kindlin-2 expressing pre-osteoblasts with a combination of



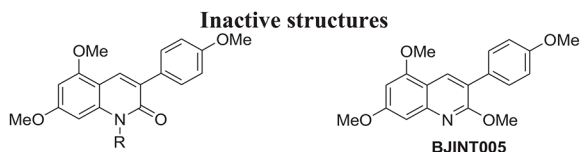

| Name                         | R                                                 |
|------------------------------|---------------------------------------------------|
| <b>Compound 1 = BJINT020</b> | -H                                                |
| <b>BJINT001</b>              | -(CH <sub>2</sub> ) <sub>2</sub> -CN              |
| <b>BJINT002</b>              | -(CH <sub>2</sub> ) <sub>2</sub> -(tétrazol-2-yl) |
| <b>BJINT004</b>              | -(CH <sub>2</sub> ) <sub>3</sub> -CN              |

**BJINT003 and correlated structures**

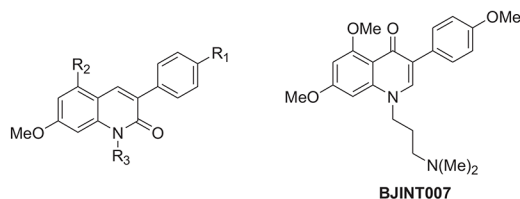

|                 | R <sub>1</sub> , R <sub>2</sub> , R <sub>3</sub>                                                                | Cell spreading inhibition (IC <sub>50</sub> , $\mu$ M) | Cell attachment inhibition (IC <sub>50</sub> , $\mu$ M) |
|-----------------|-----------------------------------------------------------------------------------------------------------------|--------------------------------------------------------|---------------------------------------------------------|
| <b>BJINT003</b> | R <sub>1</sub> , R <sub>2</sub> = OMe, R <sub>3</sub> = -(CH <sub>2</sub> ) <sub>3</sub> -N(Me) <sub>2</sub>    | 9.34 ± 1.35                                            | 14.88 ± 2.14                                            |
| <b>BJINT007</b> | /                                                                                                               | 17.06 ± 2.12                                           | 17.23 ± 1.08                                            |
| <b>BJINT008</b> | R <sub>1</sub> , R <sub>2</sub> = OMe, R <sub>3</sub> = -(CH <sub>2</sub> ) <sub>2</sub> -N(Me) <sub>2</sub>    | 15.49 ± 2.07                                           | 20.66 ± 2.31                                            |
| <b>BJINT010</b> | R <sub>1</sub> , R <sub>2</sub> = OMe, R <sub>3</sub> = -(CH <sub>2</sub> ) <sub>4</sub> -N(Me) <sub>2</sub>    | 9.61 ± 0.34                                            | 9.22 ± 0.19                                             |
| <b>BJINT011</b> | R <sub>1</sub> , R <sub>2</sub> = OMe, R <sub>3</sub> = -(CH <sub>2</sub> ) <sub>3</sub> -N(Et) <sub>2</sub>    | 9.41 ± 0.59                                            | 16.77 ± 1.57                                            |
| <b>BJINT013</b> | R <sub>1</sub> = H, R <sub>2</sub> = OMe, R <sub>3</sub> = -(CH <sub>2</sub> ) <sub>3</sub> -N(Me) <sub>2</sub> | 33.23 ± 4.57                                           | 42.67 ± 7.54                                            |
| <b>BJINT015</b> | R <sub>1</sub> = OMe, R <sub>2</sub> = H, R <sub>3</sub> = -(CH <sub>2</sub> ) <sub>3</sub> -N(Me) <sub>2</sub> | No activity                                            | No activity                                             |

**BJINT006 and correlated structures**

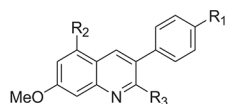

|                 | R <sub>1</sub> , R <sub>2</sub> , R <sub>3</sub>                                                                 | Cell spreading inhibition (IC <sub>50</sub> , $\mu$ M) | Cell attachment inhibition (IC <sub>50</sub> , $\mu$ M) |
|-----------------|------------------------------------------------------------------------------------------------------------------|--------------------------------------------------------|---------------------------------------------------------|
| <b>BJINT006</b> | R <sub>1</sub> , R <sub>2</sub> = OMe, R <sub>3</sub> = -O(CH <sub>2</sub> ) <sub>3</sub> -N(Me) <sub>2</sub>    | 13.43 ± 1.96                                           | 18.44 ± 1.67                                            |
| <b>BJINT009</b> | R <sub>1</sub> , R <sub>2</sub> = OMe, R <sub>3</sub> = -O(CH <sub>2</sub> ) <sub>2</sub> -N(Me) <sub>2</sub>    | 14.9 ± 2.23                                            | 22 ± 2.83                                               |
| <b>BJINT012</b> | R <sub>1</sub> , R <sub>2</sub> = OMe, R <sub>3</sub> = -O(CH <sub>2</sub> ) <sub>3</sub> -N(Et) <sub>2</sub>    | 32.35 ± 2.69                                           | 34.89 ± 1.39                                            |
| <b>BJINT014</b> | R <sub>1</sub> = H, R <sub>2</sub> = OMe, R <sub>3</sub> = -O(CH <sub>2</sub> ) <sub>3</sub> -N(Me) <sub>2</sub> | 21.27 ± 3.28                                           | 23 ± 2.64                                               |
| <b>BJINT016</b> | R <sub>1</sub> = OMe, R <sub>2</sub> = H, R <sub>3</sub> = -O(CH <sub>2</sub> ) <sub>3</sub> -N(Me) <sub>2</sub> | 24.71 ± 4.12                                           | 34 ± 2.90                                               |
| <b>BJINT017</b> | R <sub>1</sub> , R <sub>2</sub> = OMe, R <sub>3</sub> = -O(CH <sub>2</sub> ) <sub>4</sub> -N(Me) <sub>2</sub>    | 11.27 ± 0.44                                           | 18.22 ± 1.54                                            |
| <b>BJINT018</b> | R <sub>1</sub> , R <sub>2</sub> = OMe, R <sub>3</sub> = -C≡C-CH <sub>2</sub> -N(Me) <sub>2</sub>                 | 30.29 ± 3.34                                           | 66 ± 2.83                                               |
| <b>BJINT019</b> | R <sub>1</sub> , R <sub>2</sub> = OMe, R <sub>3</sub> = -(CH <sub>2</sub> ) <sub>3</sub> -N(Me) <sub>2</sub>     | 21.08 ± 3.51                                           | 31.11 ± 8.15                                            |

**Fig 2. The activity of BJINT family members is closely related to their structure.** Structure-activity relationship of 3-arylquinolines and 3-aryl-2-quinolones on cell spreading and attachment. BJINT003, BJINT006 and derivatives impair cell spreading and attachment mediated by focal adhesions. The activities have been estimated using at least three independent experiments where cells have been spread on fibronectin, fixed and stained with Crystal Violet.

doi:10.1371/journal.pone.0141205.g002

BJINT006 and Blebbistatin, a specific myosin-II inhibitor [31], (Fig 3B). Blebbistatin at 10  $\mu$ M was added to cells during their spreading and BJINT006 was added 2 h later. When cell contractility was inhibited with Blebbistatin, the cells displayed a greater projected area compared to untreated cells. However, BJINT006 treatment for two hours still resulted in cell rounding up, suggesting that myosin II is not the primary target of the drug and that the molecule is active even when integrin clustering cannot be triggered by inner tension.

### Integrin engagement in cell adhesion is necessary for BJINT full activity

Next, we wondered whether integrins or associated proteins might be directly targeted by the molecule. Indeed, if the protein platform, recruited around integrin cytoplasmic tails, or the integrins themselves were the molecular target of BJINT drugs, these compounds should be ineffective on cell adhesion when this latter process does not require integrin engagement with the ECM substrate. To address this question, we studied BJINT006 and BJINT020 adhesion inhibition on cells spread on fibronectin and compared it to cells attached to poly-lysine, a substrate known to support cell adhesion in a non-specific, integrin-independent manner [32]. When seeded on poly-lysine, the cells, although being adherent, did not spread on the substrate. Neither BJINT006 nor BJINT020 addition at the concentration of 25  $\mu$ M significantly affected cell attachment to poly-lysine, while cell attachment on fibronectin was reduced by more than 90% by BJINT006 (Fig 3C). Consistent with the results described above, addition of BJINT020 did not significantly impair cell adhesion on both substrates. These results strongly suggested that the drugs specifically impaired integrin related adhesive structures. Specificity was further confirmed by the  $Mn^{2+}$  artificial switch of the integrins to the high affinity state that antagonized both BJINT006 and BJINT011 action (Fig 3D), while BJINT020 was once again ineffective on cell adhesion, independent on the experimental conditions used. These latter results suggested that the adhesion defect observed upon drug treatment was due to a lack of integrin activation.

### Platelet activation processes are impaired upon BJINT006/011 treatment

To further confirm that bioactive BJINT components inhibit integrin activation and/or clustering, we investigate the drug action on physiological and well characterized processes, namely platelet spreading, clot retraction, and platelet aggregation, that are largely dependent on  $\alpha_{IIb}\beta_3$  activation. Indeed, the switch from low to high affinity states is required for platelets to spread and aggregate. Furthermore,  $\alpha_{IIb}\beta_3$  provides the physical link between the platelet cytoskeleton and the fibrin network, which is essential for clot retraction. Therefore, we first checked whether BJINT006, 011 and 020 were able to prevent platelet spreading on fibrinogen. Similarly to what was found with pre-osteoblasts, platelet spreading was impaired by BJINT006 and 011 in a dose dependent manner but not by 020 (Fig 4A left panel). However, platelets adhesion was not affected by the drug, consistent with the known ability of  $\alpha_{IIb}\beta_3$  to interact with immobilized fibrinogen independently of integrin activation (Fig 4A right panel).

Platelet aggregation requires  $\alpha_{IIb}\beta_3$  linkage with fibrinogen. Indeed, in the presence of BJINT006 and BJINT011, collagen-induced platelet aggregation was completely abolished (Fig 4B right panel). This result clearly fits with experimental data showing that  $\beta_1$  knock out

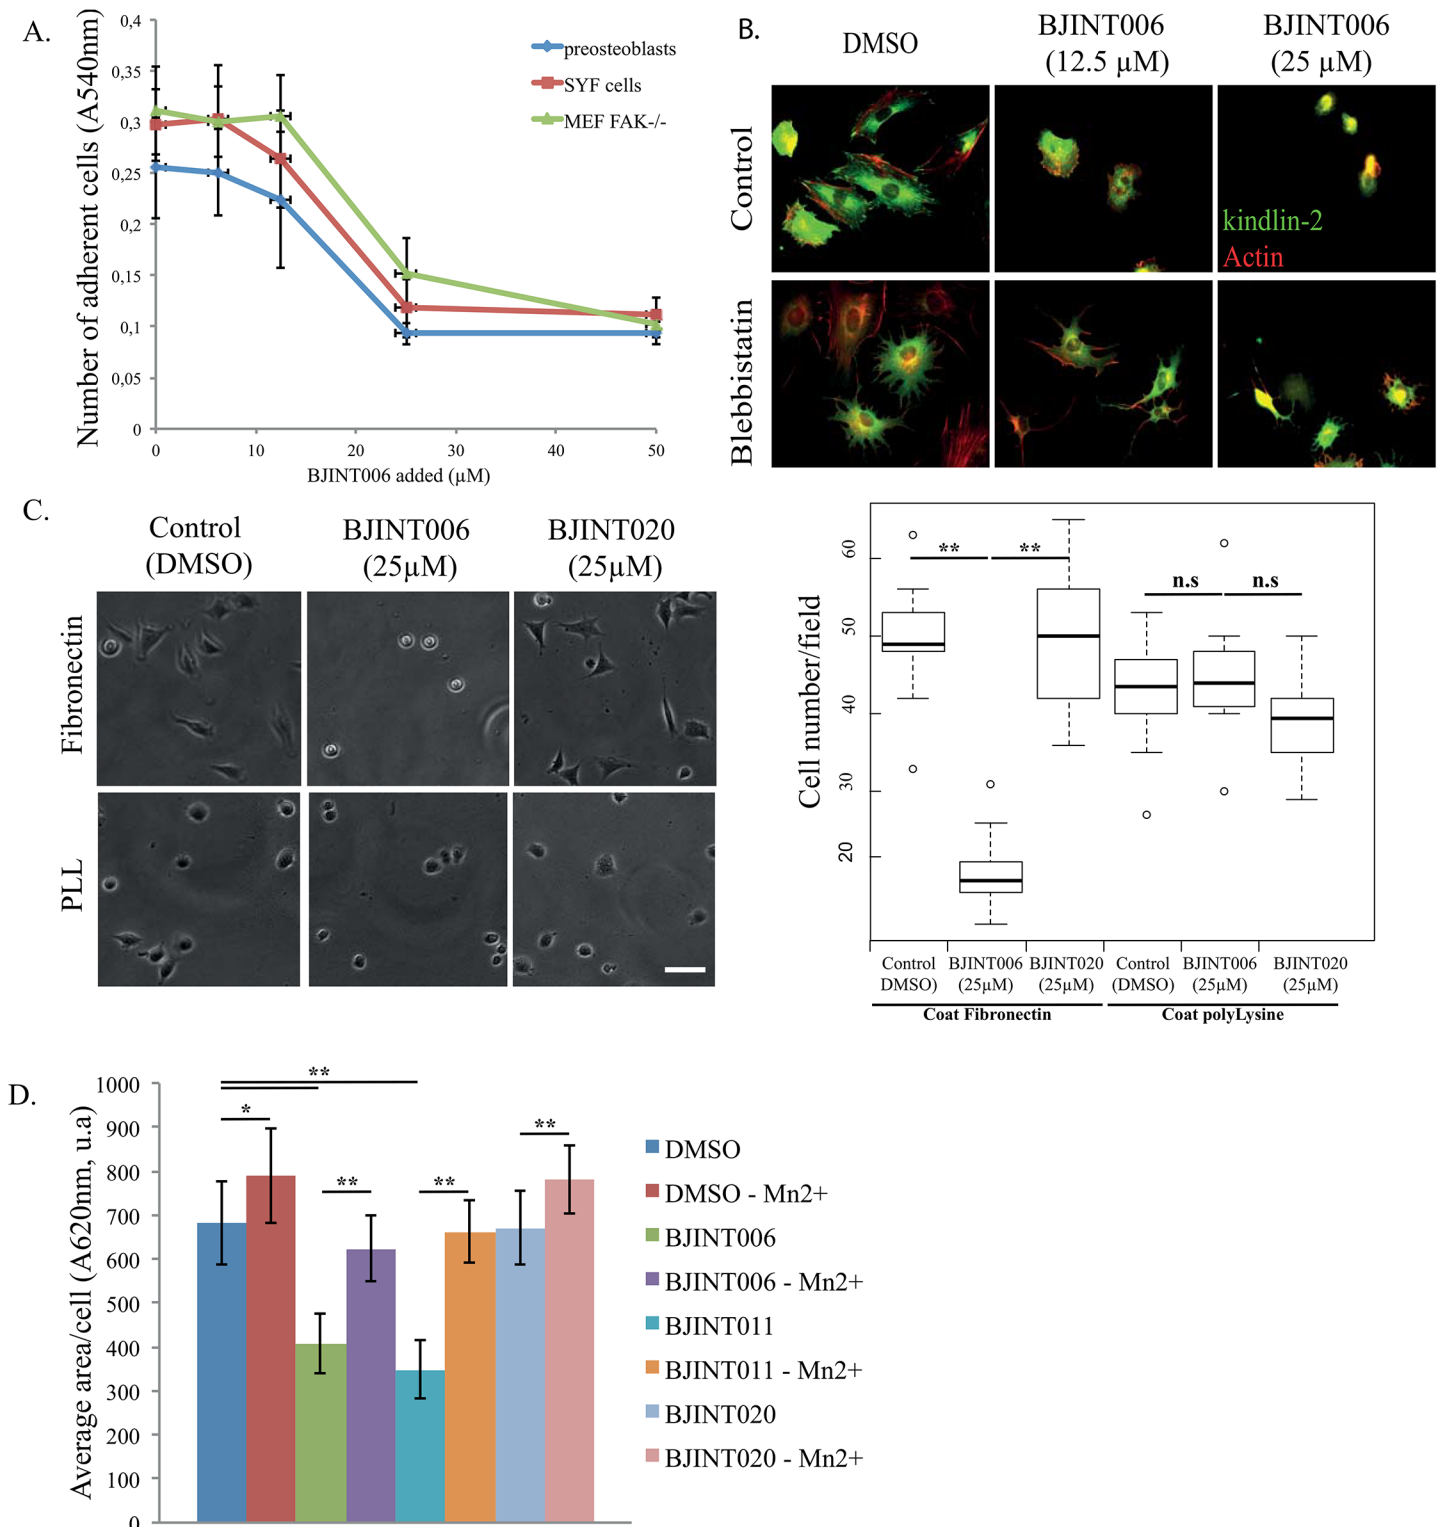

**Fig 3. BJINT derivative inhibition of cell adhesion is integrin dependent.** (A) Pre-osteoblasts, FAK<sup>-/-</sup> MEFs, or MEFs devoid of Src, Yes, Fyn kinase expression (SYF cells) were allowed to spread for 1 h 30 on fibronectin coated multi-well plates in presence of increasing concentrations of BJINT006. Adhesion was inhibited similarly in all cell lines. (B) Pre-osteoblasts expressing GFP-kindlin2 spread for 1 h on fibronectin coated coverslips were treated with 10  $\mu\text{M}$  Blebbistatin. BJINT006 at 12.5 or 25  $\mu\text{M}$  in DMSO was then added directly into the cell medium and cell culture was continued for 2 h. Cells were fixed in 4% PFA. Cell contractility inhibition by Blebbistatin does not prevent cell rounding up after BJINT006 treatment. (C) Cells were seeded on fibronectin or poly-lysine for 2 h before 1 h incubation with BJINT006, 011, or 020. The cell adhesion on poly-lysine was not significantly modified by BJINT treatment in

contrast to cells spread on fibronectin. (D)  $MnCl_2$ , an artificial activator of integrins was introduced into the cell culture medium at the concentration of 1  $\mu M$  prior addition of BJINT derivatives. It efficiently prevents cell adhesion inhibition by BJINT006 and 011.

doi:10.1371/journal.pone.0141205.g003

completely abolished aggregation in response to soluble collagen [33]. When aggregation was induced with ADP (Fig 4B left panel), the initial aggregation was normal but limited and platelets could not sustain aggregation over time suggesting that the secretory phase of aggregation

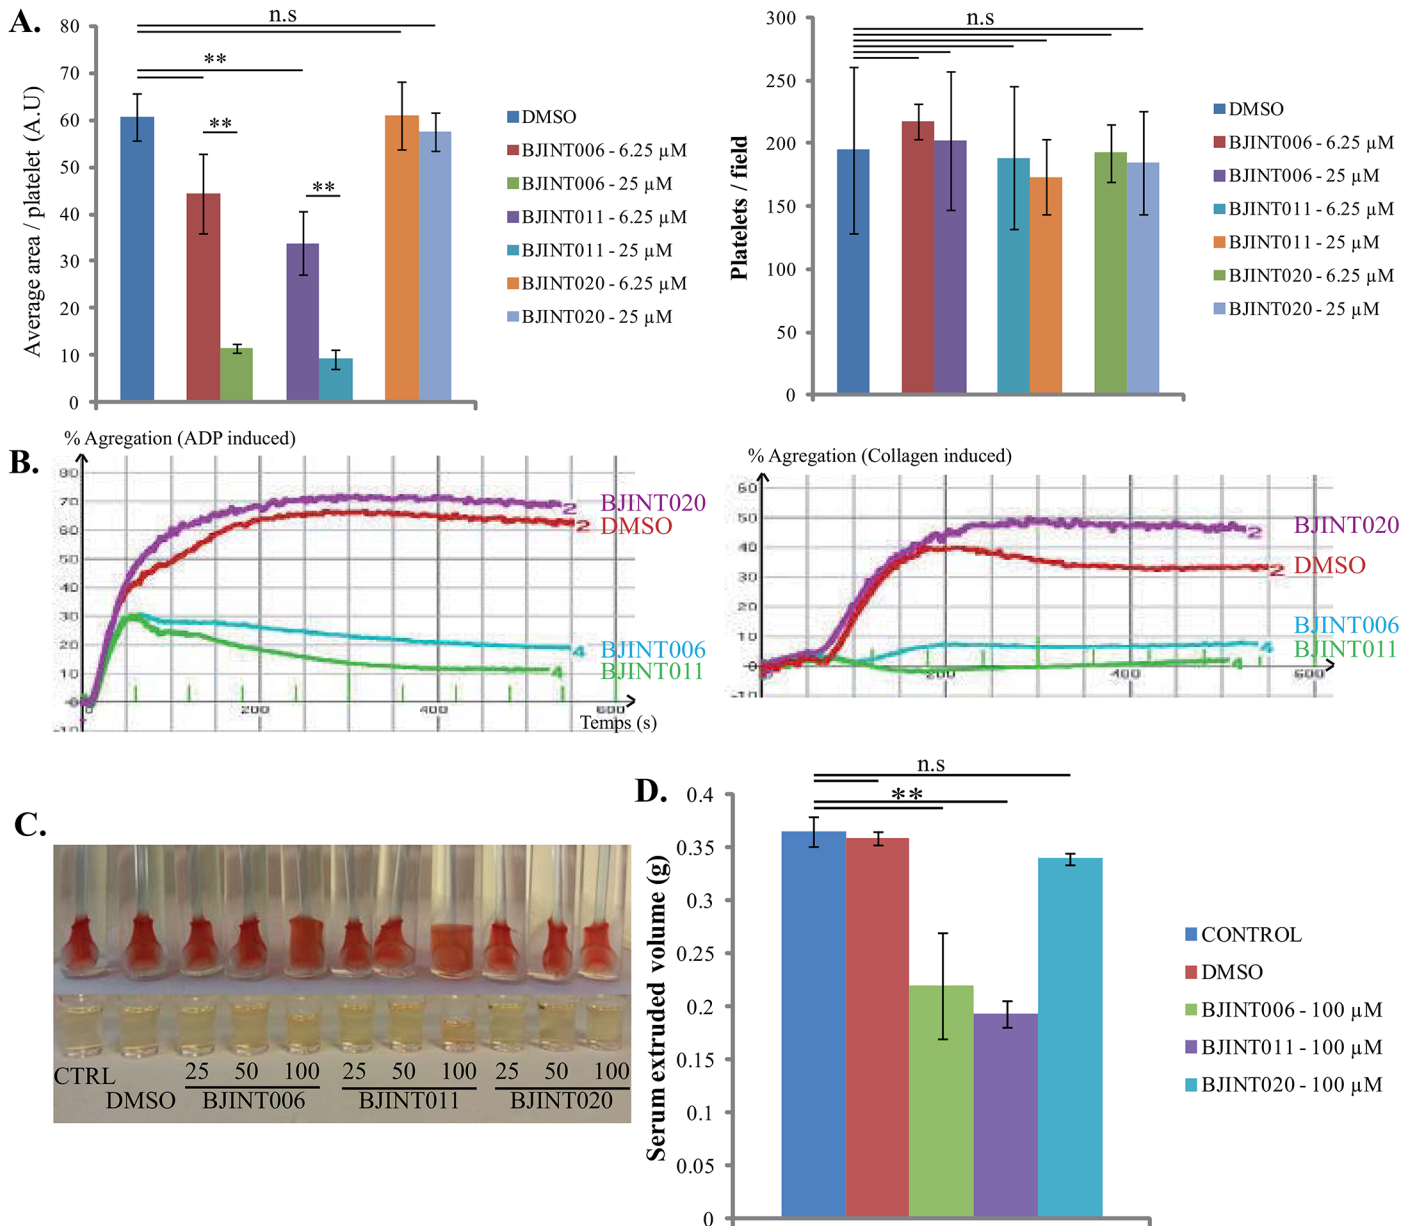

**Fig 4. BJINT006 and 011 inhibit  $\alpha_{IIb}\beta_3$  mediated platelet activation related processes.** (A) Platelet adhesion and spreading on collagen were carried out as described under Materials and Methods. Quantification of spreading and adhesion upon BJINT006, 011, and 020 treatments is shown on left and right panels, respectively. (B) Collagen- and ADP -induced aggregation kinetics are shown. Aggregation assays are carried out in the presence or absence of BJINT derivatives (50 $\mu M$ ). (C) Clot retraction is induced by thrombin addition to PRP as described under Materials and Methods. BJINT006, 011 but not BJINT020, prevents proper clot retraction at the concentration of 100  $\mu M$ . (D) The extruded serum volume was measured 10 minutes after thrombin addition to quantify clot retraction.

doi:10.1371/journal.pone.0141205.g004

did not occur. BJINT molecules are hydrophobic and must undergo a phase partitioning between membranes and cytosol as a prerequisite of their action. Therefore BJINT pharmacodynamics are likely slow. Consistent with this view, a 15 min preincubation of platelets with the drugs enable us to block aggregation to a similar level but with a twofold lower drug concentration (200 to 100  $\mu\text{M}$ ). Compared to ADP induction, collagen induction of platelet aggregation is slower and may provide sufficient time for the drugs to act. Finally, we studied the ability of treated platelets to achieve clot retraction which arises from the transmission of actomyosin forces to the fibrin network through activated  $\alpha_{\text{IIb}}\beta_3$ . At high concentrations of BJINT006 and 011 but not BJINT020 (100  $\mu\text{M}$ ), the clots fail to retract (Figs 4C and 2D). Altogether, these experiments showed that, as expected for an antagonist of integrin activation, BJINT006 and 011 exhibited a strong inhibition of platelet aggregation and are potential anti-thrombotic agents.

### BJINT derivatives inhibit integrin activation independently of kindlin and talin recruitment

Talin and kindlin recruitment onto the  $\beta$  cytoplasmic tail is regarded as the end point of integrin activation [34]. Therefore we studied the possible competition between the small molecules and these proteins for the interactions with the integrin intracellular domain. Pull-down assays were carried out to investigate the interaction between overexpressed DsRed-talin head domain or endogenous kindlin-2, overexpressed GFP-kindlin-2, and GST- $\beta_3$  or GST- $\beta_1$  cytoplasmic domains in presence or absence of BJINT006 or 020. Under our experimental conditions, no differences could be observed in talin head/ $\beta_3$  or  $\beta_1$  integrin interactions whatever the drug used, while kindlin-2 interaction with the  $\beta_3$  cytoplasmic domain but not  $\beta_1$  was reduced up to 70% by BJINT 006, but not BJINT020, consistent with *ex vivo* results (Fig 5A). However, in pull down assays, molar ratios between integrins and cytoplasmic partners are not controlled and we could not exclude that under our experimental conditions, drug inhibition on  $\beta_1$  interactions with its partners might have been blunted by an excess of ligand. In addition, since the drugs were added into the cytosol, one cannot exclude an additional effect of these drugs onto an upstream or alternative regulatory mechanisms of talin and kindlin recruitment. Therefore, we designed a solid phase binding assay of purified biotinylated integrin tails fused to GST onto immobilized purified GST tagged kindlin-2 FERM domain or talin F2/F3 domain. Unspecific binding was estimated using plain GST. This assay allowed the measurement of typical saturation curves (S4 Fig) and to determine the integrin tail concentrations under which the interaction with the partner should be sensitive to a competitive inhibitors. Under these experimental conditions, the overall drug inhibition of the binding of kindlin-2 FERM domain or of talin F2/F3 domain on  $\beta_1$  or  $\beta_3$  tails were either absent or quite small even at 50  $\mu\text{M}$ , (Fig 5B). NMR studies to detect a direct interaction of BJINT 006 on the  $\beta_3$  cytoplasmic domain exhibited very small shifts that were identical for all amino acids, suggesting a non-specific interaction (S6 Fig). On the other hand, ITC experiments did not reveal any interaction (not shown). Altogether, these data suggested that BJINT compounds may not specifically interact with integrin tails. Therefore one could conclude that BJINT molecules interfere with integrin activation events upstream or alternative to talin and kindlin recruitment.

### BJINT derivatives inhibit outside-in integrin signaling

Many biases with currently available integrin antagonists originate from their ability to trigger outside-in signaling while they efficiently inhibit inside-out signaling and subsequent cell-matrix or cell-cell interactions. Since BJINT derivatives target integrin tails, we wondered whether they were able to hamper integrin outside-in signaling. As read-out we looked at the

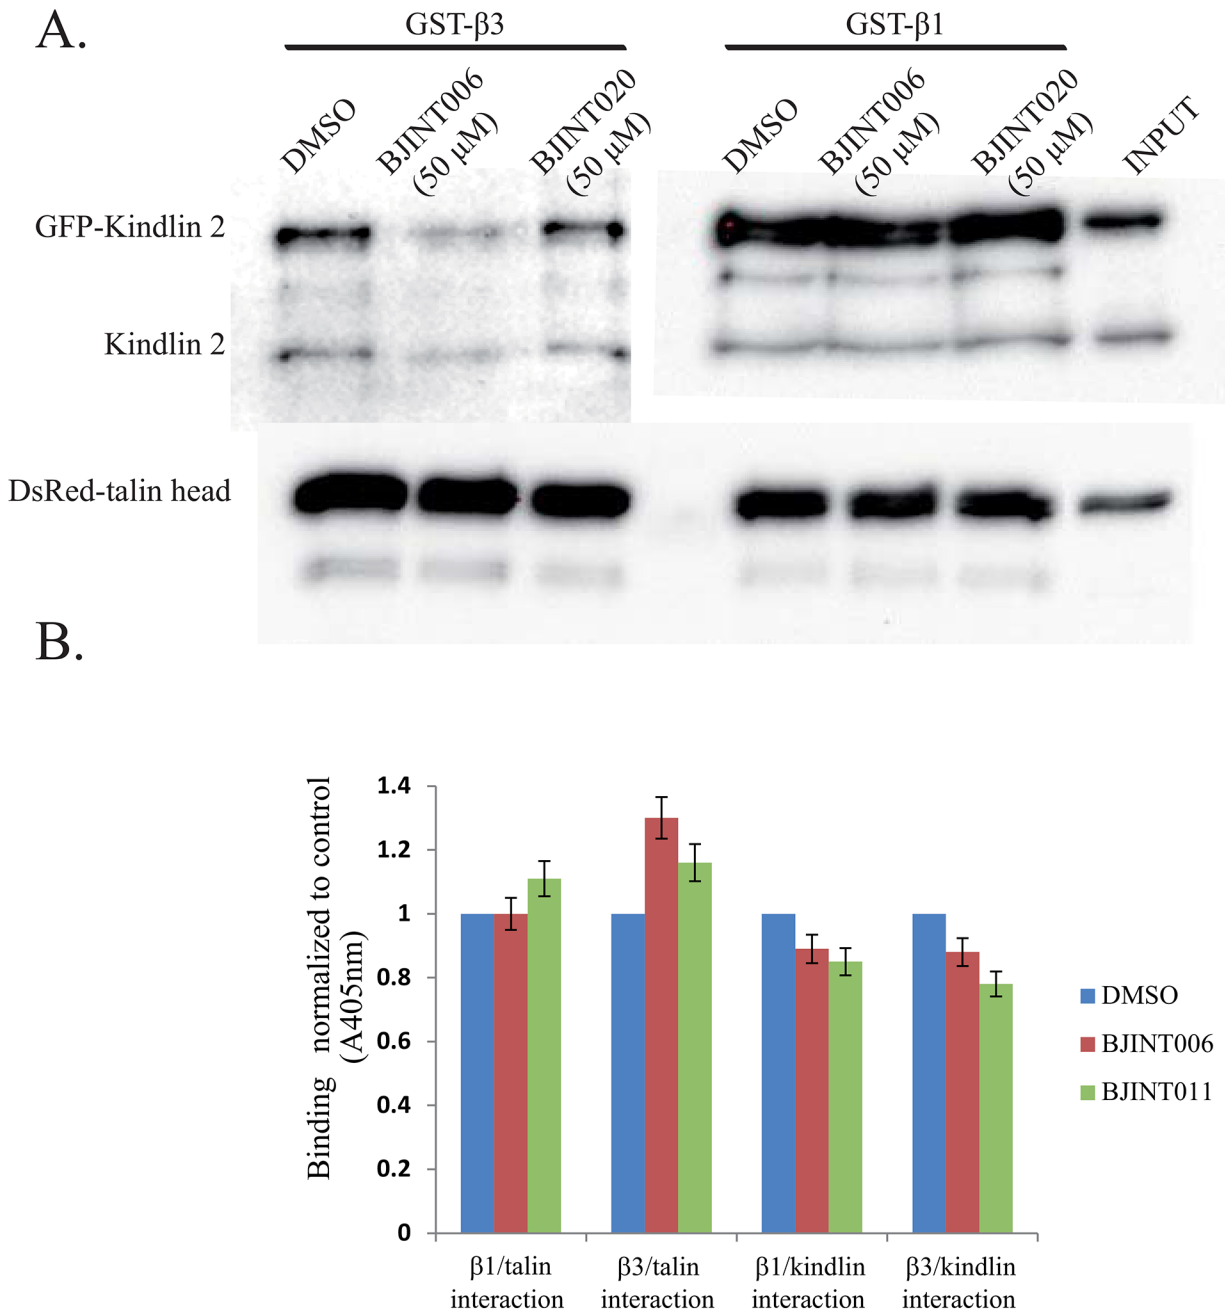

**Fig 5. BJINT derivatives interfere with the binding of talin and kindlin to integrin cytoplasmic tails.** (A) Pull-down assays with GST-β<sub>3</sub> and GST-β<sub>1</sub> tails bound to glutathione beads incubated for 4 h with cells lysates. Associated talin head and kindlin was revealed Western blotting using anti kindlin and anti talin head antibodies. Chemiluminescence was monitored by Biorad imager. (B) Summary of 6 solid phase binding assays of biotinylated integrin tails to talin (F2/F3 domain) and kindlin-2 (FERM domain) under non saturable conditions and in the presence of 50 μM BJINT derivatives.

doi:10.1371/journal.pone.0141205.g005

auto-phosphorylation of FAK, one of the earliest events of integrin signaling using the established procedure described in [35]. Briefly, HeLa cells were re-suspended in the medium to switch off integrin signaling, then specific integrin signaling was switched on again by adding the activating β<sub>1</sub> integrin monoclonal antibody TS2/16 in presence or absence of the drug. In that way, the action of BJINT molecules could not be attributed to an indirect effect due to cell



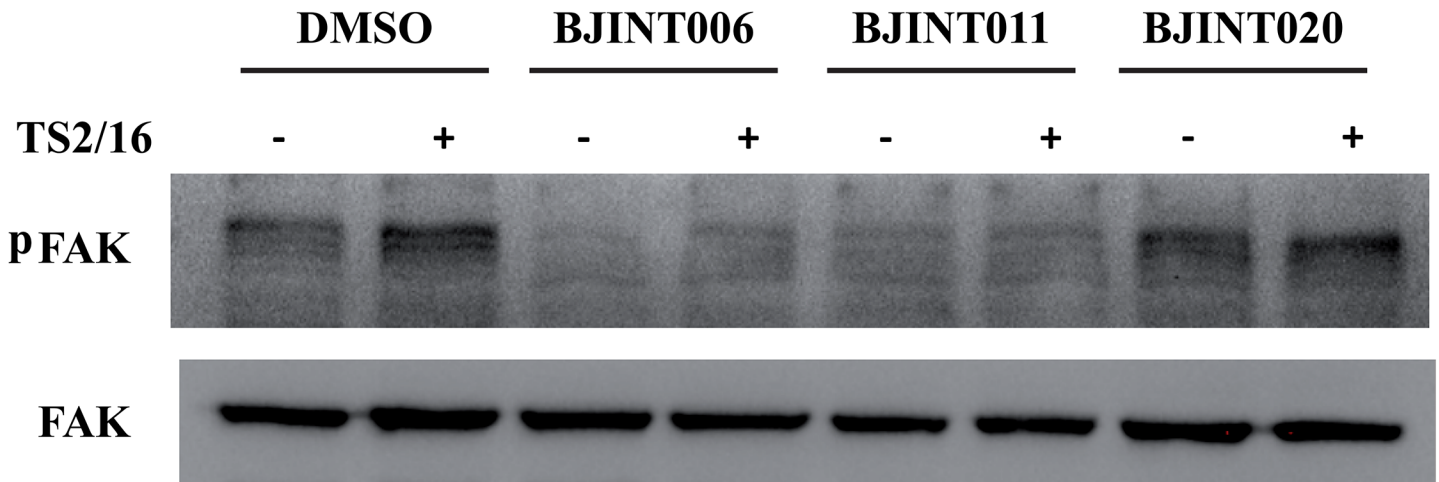

**Fig 6. BJINT derivatives blunt integrin outside-in signaling.** Auto-phosphorylation of FAK, one of the earliest integrin dependent signaling events was used as readout of integrin signaling activity.  $10^7$  HeLa cells were harvested and incubated for 1 h at 37°C in D-MEM, then suspended at the concentration of  $10^6$  cells/mL as described in [35] with TS2/16 monoclonal antibody and BJINT molecules or DMSO. Cells were centrifuged and lysed in Laemmli's sample buffer and analyzed by Western blotting.

doi:10.1371/journal.pone.0141205.g006

detachment. After one hour in suspension, phosphorylation of tyrosine 397 still could be detected in cell lysates, although this level was slightly increased upon addition of the  $\beta_1$  activating monoclonal antibody TS2/16. BJINT006 and 011, but not 020, completely abolished FAK auto-phosphorylation and likely all the downstream stages of integrin signaling (Fig 6).

### Discussion

The data presented indicate that the previously described inhibition of cell migration by 3-aryl-quinoline and 3-aryl-2-quinolone derivatives was likely due to the ability of these compounds to alter the integrity of structures relying on integrins, as visualized by GFP-kindlin-2 delocalization. Conversely to Kindlin-1 and -3, kindlin-2 is universally expressed and constitutes a choice marker of focal adhesions whatever the cell line used. Since integrin activation was largely described to be dependent on the recruitment of kindlin-2 [36, 37], delocalization of GFP-kindlin-2 appeared as a pertinent read-out. Kindlin-3 is preferentially expressed in blood cell lineage. A decrease in its expression in humans causes type III leukocyte adhesion deficiency (LAD-III), which is associated with an inability to activate integrins on platelets and leukocytes and manifests as susceptibility to bleeding and infections. However, kindlin-2 was shown to be able to activate  $\beta_3$  integrins at least ex vivo [38], indicating that both proteins have a similar function regarding  $\beta_3$  integrin activation. Conversely, kindlin-3 was shown to be unable to compensate kindlin-2 loss for  $\alpha_5\beta_1$  activation in fibroblasts [39].

Our experiments ruled out the possibility that BJINT inhibition of cell adhesion was directly linked to cell contractility, FAK, and Src signaling. In addition, the antagonistic action of  $Mn^{2+}$  (a specific activator of integrin receptors) together with the drug insensitivity of cells attached on Poly-lysine point to the targeting of integrin activation by BJINT through an indirect but common process on inside-out mechanism resulting in the lack of specificity toward extracellular matrix components. In turn, the switch to the integrin low affinity conformation would result in the disruption of the adhesive structures.

This indirect effect is suggested by the lack of any detected interaction of BJINT molecules with integrin tails and the absence of an inhibitory effect of the drugs on the binding of the purified tails to purified integrin partners such as kindlins and talin, although we cannot rule

out the possibility that full length talin or kindlin-2 may behave differently than the F2/F3 talin domain and kindlin-2 FERM domain, respectively. In addition, since both pull downs and solid phase assays were carried out in detergent to minimize non-specific binding, the hydrophobic nature of these small molecules may account for their trapping into micelles, thus resulting in a strong decrease in their actual efficient concentration. In vivo, membranes play a major role in integrin activation and their interaction with cytoplasmic partners, and may also strongly modulate BJINT inhibitory activity. For instance, under physiological conditions, not only talin head domain, but also talin tail may participate to the integrin activation process, which also requires the disruption of the saline bridge and separation of  $\alpha$  and  $\beta$  cytoplasmic domains. In addition, it was recently reported that talin interaction with  $\beta_3$  tail occurs in two waves, one which triggers external ligand binding but is not involved in outside-in signaling the other one that is dependent on G $\alpha$ 13 which selectively mediates outside-in signaling [40]. Therefore it is conceivable that BJINT molecules only impair this second interacting process while pull down assays only monitor the first one. Phosphoinositide phosphate have also been reported to play a role in kindlin-2 activity [41]. Finally, while evidence has recently been provided that talin head and kindlin can interact at the same time on integrin tail [42], the spatio-temporal roles of these two major players are yet to be unraveled.

Upstream or alternative direct targets of BJINT derivatives can be envisioned. For instance, kindlin-2 binding to Integrin linked kinase (ILK) pseudokinase complex was reported to play a major role in focal adhesion localization of the protein [43]. Other possible candidates are adaptor proteins allowing the membrane recruitment of the Rap1-interacting adapter molecule (RIAM) as already demonstrated for  $\alpha_{IIb}\beta_3$  integrins [44]. Finally, the drug may strengthen the interaction with endogenous inhibitors in the  $\alpha$  cytoplasmic tail such as sharpin [45].

Whatever the mechanism, it is clear that BJINT molecules blunt both inside-out and outside-in integrin signaling with a broad receptor spectra. As expected for such a mechanism, BJINT derivatives block the integrin dependent processes in platelets, and are therefore potential anti-thrombotic agents. For ADP triggered aggregation however, a limited initial phase of aggregation was still present. Recently it has been proposed that  $\alpha_{IIb}\beta_3$  activation is triggered by talin while kindlin favors clustering [21]. According to this mechanism, and since BJINT derivatives seem to favor rather than inhibit talin/ $\beta_3$  and blocks kindlin  $\beta_3$  tail interaction, it is conceivable that they only block the integrin clustering required for sustaining platelet aggregation over time.

SAR studies with twenty members of the 3-arylquinoline and 3-aryl-2-quinolone series shed some light on important structural features required for the improvement of the molecule efficiency. Higher affinity compounds will allow structural studies that should help optimizing the BJINT family members to reach the submicromolar affinity, thus opening the doors to therapeutic uses. By blocking the integrin cytoplasmic face, this new class of molecules is expected to minimize integrin outside-in signaling that is a major drawback of all RGD-mimetic agents presently used in therapy. Inhibiting integrin signaling has long been thought to be a potent way to suppress unwanted downstream signaling pathways [3]. The proof of concept that such a strategy can be achieved has been provided a couple of years ago when  $\alpha_4$ -integrin/paxillin interaction has been inhibited by a small molecule (Kummer et al., 2010). Herein, we showed using FAK auto-phosphorylation as readout that bioactive BJINT derivatives efficiently blunt integrin outside-in signaling.

Our work provides the first example of small molecules able to cross the plasma membrane and impair integrin both inside-out and outside-in signaling. It demonstrates that 3-arylquinoline and 3-aryl-2-quinolone derivatives can be efficiently used to block a physiological process, i.e. platelet activation.

## Supporting Information

**S1 Fig. Colocalization of GFP-kindlin-2 and kindlin-2.**

(EPS)

**S2 Fig. Toxicity of BJINT derivatives: Analyses of 3 representative molecules.**

(EPS)

**S3 Fig. BJINT006 cell adhesion inhibition is not specific to an ECM substrate.**

(EPS)

**S4 Fig. Synthesis strategy for BJINT010-BJINT019.**

(EPS)

**S5 Fig. Binding of  $\beta_1$  and  $\beta_3$  integrin tails onto talin F2/F3 domain and kindlin-2 FERM domain.**

(EPS)

**S6 Fig. RMN signal shifts with  $\beta_3$  cytoplasmic tail in the presence or absence of BJINT 06**

(EPS)

**S1 Methods. Chemical general procedure, synthesis and characterizations.**

(DOCX)

## Acknowledgments

We thank Pr. Benoît Polack (Grenoble Hospital) for granting us access to the aggregometer facility, Pr. David Crichley and Dr. Yizheng Tu for providing Talin and kindlin-2 constructs, respectively, Dr. C. Albiges-Rizo and Dr. L. Lafanechere (IAB Grenoble) for fostering us working with small molecules.

## Author Contributions

Conceived and designed the experiments: SF KS DB OV BJ MRB. Performed the experiments: SF XL KS GF BJ MRB. Analyzed the data: SF KS OV MRB. Contributed reagents/materials/analysis tools: DB OV GF BJ. Wrote the paper: SF KS DB BJ MRB.

## References

1. Bouvard D, Pouwels J, De Franceschi N, Ivaska J. Integrin inactivators: balancing cellular functions in vitro and in vivo. *Nat Rev Mol Cell Biol.* 2013; 14(7):432–44. doi: [10.1038/nrm3599](https://doi.org/10.1038/nrm3599) PMID: [23719537](https://pubmed.ncbi.nlm.nih.gov/23719537/).
2. Niu G, Chen X. Why integrin as a primary target for imaging and therapy. *Theranostics.* 2011; 1:30–47. Epub 2011/05/06. PMID: [21544229](https://pubmed.ncbi.nlm.nih.gov/21544229/).
3. Cox D, Brennan M, Moran N. Integrins as therapeutic targets: lessons and opportunities. *Nat Rev Drug Discov.* 2010; 9(10):804–20. Epub 2010/10/05. nrd3266 [pii] doi: [10.1038/nrd3266](https://doi.org/10.1038/nrd3266) PMID: [20885411](https://pubmed.ncbi.nlm.nih.gov/20885411/).
4. Goodman SL, Picard M. Integrins as therapeutic targets. *Trends Pharmacol Sci.* 33(7):405–12. Epub 2012/05/29. S0165-6147(12)00057-0 [pii] doi: [10.1016/j.tips.2012.04.002](https://doi.org/10.1016/j.tips.2012.04.002) PMID: [22633092](https://pubmed.ncbi.nlm.nih.gov/22633092/).
5. Mousa SA. Anti-integrin as novel drug-discovery targets: potential therapeutic and diagnostic implications. *Curr Opin Chem Biol.* 2002; 6(4):534–41. Epub 2002/07/23. S1367593102003502 [pii]. PMID: [12133730](https://pubmed.ncbi.nlm.nih.gov/12133730/).
6. Evans R, Patzak I, Svensson L, De Filippo K, Jones K, McDowall A, et al. Integrins in immunity. *J Cell Sci.* 2009; 122(Pt 2):215–25. Epub 2009/01/02. 122/2/215 [pii] doi: [10.1242/jcs.019117](https://doi.org/10.1242/jcs.019117) PMID: [19118214](https://pubmed.ncbi.nlm.nih.gov/19118214/).
7. Desgrosellier JS, Cheresh DA. Integrins in cancer: biological implications and therapeutic opportunities. *Nat Rev Cancer.* 2010; 10(1):9–22. Epub 2009/12/24. nrc2748 [pii] doi: [10.1038/nrc2748](https://doi.org/10.1038/nrc2748) PMID: [20029421](https://pubmed.ncbi.nlm.nih.gov/20029421/).

8. Silva R, D'Amico G, Hodivala-Dilke KM, Reynolds LE. Integrins: the keys to unlocking angiogenesis. *Arterioscler Thromb Vasc Biol.* 2008; 28(10):1703–13. Epub 2008/07/29. ATVBAHA.108.172015 [pii] doi: [10.1161/ATVBAHA.108.172015](https://doi.org/10.1161/ATVBAHA.108.172015) PMID: [18658045](https://pubmed.ncbi.nlm.nih.gov/18658045/).
9. Seguin L, Kato S, Franovic A, Camargo MF, Lesperance J, Elliott KC, et al. An integrin  $\beta_3$ -KRAS-RalB complex drives tumour stemness and resistance to EGFR inhibition. *Nat Cell Biol.* 2014; 16(5):457–68. doi: [10.1038/ncb2953](https://doi.org/10.1038/ncb2953) PMID: [24747441](https://pubmed.ncbi.nlm.nih.gov/24747441/); PubMed Central PMCID: PMC4105198.
10. Kanda R, Kawahara A, Watari K, Murakami Y, Sonoda K, Maeda M, et al. Erlotinib resistance in lung cancer cells mediated by integrin  $\beta 1$ /Src/Akt-driven bypass signaling. *Cancer Res.* 2013; 73(20):6243–53. doi: [10.1158/0008-5472.CAN-12-4502](https://doi.org/10.1158/0008-5472.CAN-12-4502) PMID: [23872583](https://pubmed.ncbi.nlm.nih.gov/23872583/).
11. Legler DF, Wiedle G, Ross FP, Imhof BA. Superactivation of integrin  $\alpha v \beta 3$  by low antagonist concentrations. *J Cell Sci.* 2001; 114(Pt 8):1545–53. Epub 2001/04/03. PMID: [11282030](https://pubmed.ncbi.nlm.nih.gov/11282030/).
12. Armstrong PC, Peter K. GPIIb/IIIa inhibitors: from bench to bedside and back to bench again. *Thromb Haemost.* 2012; 107(5):808–14. Epub 2012/03/01. 11-10-0727 [pii] doi: [10.1160/TH11-10-0727](https://doi.org/10.1160/TH11-10-0727) PMID: [22370973](https://pubmed.ncbi.nlm.nih.gov/22370973/).
13. Reynolds AR, Hart IR, Watson AR, Welti JC, Silva RG, Robinson SD, et al. Stimulation of tumor growth and angiogenesis by low concentrations of RGD-mimetic integrin inhibitors. *Nat Med.* 2009; 15(4):392–400. Epub 2009/03/24. nm.1941 [pii] doi: [10.1038/nm.1941](https://doi.org/10.1038/nm.1941) PMID: [19305413](https://pubmed.ncbi.nlm.nih.gov/19305413/).
14. Major EO. Progressive multifocal leukoencephalopathy in patients on immunomodulatory therapies. *Annu Rev Med.* 2010; 61:35–47. Epub 2009/09/02. doi: [10.1146/annurev.med.080708.082655](https://doi.org/10.1146/annurev.med.080708.082655) PMID: [19719397](https://pubmed.ncbi.nlm.nih.gov/19719397/).
15. Sheldrake HM, Patterson LH. Strategies to inhibit tumor associated integrin receptors: rationale for dual and multi-antagonists. *J Med Chem.* 2014; 57(15):6301–15. doi: [10.1021/jm5000547](https://doi.org/10.1021/jm5000547) PMID: [24568695](https://pubmed.ncbi.nlm.nih.gov/24568695/).
16. Calderwood DA, Yan B, de Pereda JM, Alvarez BG, Fujioka Y, Liddington RC, et al. The phosphotyrosine binding-like domain of talin activates integrins. *J Biol Chem.* 2002; 277(24):21749–58. Epub 2002/04/05. doi: [10.1074/jbc.M111996200](https://doi.org/10.1074/jbc.M111996200) [pii]. PMID: [11932255](https://pubmed.ncbi.nlm.nih.gov/11932255/).
17. Critchley DR, Gingras AR. Talin at a glance. *J Cell Sci.* 2008; 121(Pt 9):1345–7. Epub 2008/04/25. 121/9/1345 [pii] doi: [10.1242/jcs.018085](https://doi.org/10.1242/jcs.018085) PMID: [18434644](https://pubmed.ncbi.nlm.nih.gov/18434644/).
18. Vinogradova O, Velyvis A, Velyviene A, Hu B, Haas T, Plow E, et al. A structural mechanism of integrin  $\alpha (IIb) \beta (3)$  "inside-out" activation as regulated by its cytoplasmic face. *Cell.* 2002; 110(5):587–97. PMID: [12230976](https://pubmed.ncbi.nlm.nih.gov/12230976/).
19. Wegener KL, Partridge AW, Han J, Pickford AR, Liddington RC, Ginsberg MH, et al. Structural basis of integrin activation by talin. *Cell.* 2007; 128(1):171–82. Epub 2007/01/16. S0092-8674(06)01596-0 [pii] doi: [10.1016/j.cell.2006.10.048](https://doi.org/10.1016/j.cell.2006.10.048) PMID: [17218263](https://pubmed.ncbi.nlm.nih.gov/17218263/).
20. Karakose E, Schiller HB, Fassler R. The kindlins at a glance. *J Cell Sci.* 2010; 123(Pt 14):2353–6. Epub 2010/07/02. 123/14/2353 [pii] doi: [10.1242/jcs.064600](https://doi.org/10.1242/jcs.064600) PMID: [20592181](https://pubmed.ncbi.nlm.nih.gov/20592181/).
21. Ye F, Petrich BG, Anekal P, Lefort CT, Kasirer-Friede A, Shattil SJ, et al. The mechanism of kindlin-mediated activation of integrin  $\alpha IIb \beta 3$ . *Curr Biol.* 2013; 23(22):2288–95. doi: [10.1016/j.cub.2013.09.050](https://doi.org/10.1016/j.cub.2013.09.050) PMID: [24210614](https://pubmed.ncbi.nlm.nih.gov/24210614/); PubMed Central PMCID: PMC3912999.
22. Kummer C, Petrich BG, Rose DM, Ginsberg MH. A small molecule that inhibits the interaction of paxillin and  $\alpha 4$  integrin inhibits accumulation of mononuclear leukocytes at a site of inflammation. *J Biol Chem.* 2010; 285(13):9462–9. Epub 2010/01/26. M109.066993 [pii] doi: [10.1074/jbc.M109.066993](https://doi.org/10.1074/jbc.M109.066993) PMID: [20097761](https://pubmed.ncbi.nlm.nih.gov/20097761/).
23. Joseph B, Darro F, Behard A, Lesur B, Collignon F, Decaestecker C, et al. 3-Aryl-2-quinolone derivatives: synthesis and characterization of in vitro and in vivo antitumor effects with emphasis on a new therapeutic target connected with cell migration. *J Med Chem.* 2002; 45(12):2543–55. Epub 2002/05/31. jm010978m [pii]. PMID: [12036363](https://pubmed.ncbi.nlm.nih.gov/12036363/).
24. Nieswandt B, Varga-Szabo D, Elvers M. Integrins in platelet activation. *J Thromb Haemost.* 2009; 7 Suppl 1:206–9. doi: [10.1111/j.1538-7836.2009.03370.x](https://doi.org/10.1111/j.1538-7836.2009.03370.x) PMID: [19630801](https://pubmed.ncbi.nlm.nih.gov/19630801/).
25. Engvall E, Ruoslahti E. Binding of soluble form of fibroblast surface protein, fibronectin, to collagen. *Int J Cancer.* 1977; 20(1):1–5. PMID: [903179](https://pubmed.ncbi.nlm.nih.gov/903179/).
26. Brunner M, Millon-Fremillon A, Chevalier G, Nakchbandi IA, Mosher D, Block MR, et al. Osteoblast mineralization requires  $\beta 1$  integrin/ICAP-1-dependent fibronectin deposition. *J Cell Biol.* 2011; 194(2):307–22. Epub 2011/07/20. jcb.201007108 [pii] doi: [10.1083/jcb.201007108](https://doi.org/10.1083/jcb.201007108) PMID: [21768292](https://pubmed.ncbi.nlm.nih.gov/21768292/).
27. Kumar MS, Pester RE, Chen CY, Lane K, Chin C, Lu J, et al. Dicer1 functions as a haploinsufficient tumor suppressor. *Genes Dev.* 2009; 23(23):2700–4. doi: [10.1101/gad.1848209](https://doi.org/10.1101/gad.1848209) PMID: [19903759](https://pubmed.ncbi.nlm.nih.gov/19903759/); PubMed Central PMCID: PMC2788328.
28. Sadoul K, Wang J, Diagouraga B, Vitte AL, Buchou T, Rossini T, et al. HDAC6 controls the kinetics of platelet activation. *Blood.* 2012; 120(20):4215–8. Epub 2012/09/08. blood-2012-05-428011 [pii] doi: [10.1182/blood-2012-05-428011](https://doi.org/10.1182/blood-2012-05-428011) PMID: [22955928](https://pubmed.ncbi.nlm.nih.gov/22955928/).

29. Deshmukh L, Meller N, Alder N, Byzova T, Vinogradova O. Tyrosine phosphorylation as a conformational switch: A case study of integrin Beta3 cytoplasmic tail. *J Biol Chem*. 2011. Epub 2011/10/01. doi: [10.1074/jbc.M111.231951](https://doi.org/10.1074/jbc.M111.231951) PMID: [21956114](https://pubmed.ncbi.nlm.nih.gov/21956114/).
30. Ridley AJ. Life at the leading edge. *Cell*. 2011; 145(7):1012–22. Epub 2011/06/28. S0092-8674(11)00652-0 [pii] doi: [10.1016/j.cell.2011.06.010](https://doi.org/10.1016/j.cell.2011.06.010) PMID: [21703446](https://pubmed.ncbi.nlm.nih.gov/21703446/).
31. Kovacs M, Toth J, Hetenyi C, Malnasi-Csizmadia A, Sellers JR. Mechanism of blebbistatin inhibition of myosin II. *J Biol Chem*. 2004; 279(34):35557–63. Epub 2004/06/19. doi: [10.1074/jbc.M405319200](https://doi.org/10.1074/jbc.M405319200) [pii]. PMID: [15205456](https://pubmed.ncbi.nlm.nih.gov/15205456/).
32. Juliano RL, Aplin AE, Howe AK, Short S, Lee JW, Alahari S. Integrin regulation of receptor tyrosine kinase and G protein-coupled receptor signaling to mitogen-activated protein kinases. *Methods Enzymol*. 2001; 333:151–63. Epub 2001/06/13. S0076-6879(01)33053-7 [pii]. PMID: [11400332](https://pubmed.ncbi.nlm.nih.gov/11400332/).
33. Nieswandt B, Brakebusch C, Bergmeier W, Schulte V, Bouvard D, Mokhtari-Nejad R, et al. Glycoprotein VI but not alpha2beta1 integrin is essential for platelet interaction with collagen. *EMBO J*. 2001; 20(9):2120–30. doi: [10.1093/emboj/20.9.2120](https://doi.org/10.1093/emboj/20.9.2120) PMID: [11331578](https://pubmed.ncbi.nlm.nih.gov/11331578/); PubMed Central PMCID: PMCPMC125246.
34. Calderwood DA, Campbell ID, Critchley DR. Talins and kindlins: partners in integrin-mediated adhesion. *Nat Rev Mol Cell Biol*. 2013; 14(8):503–17. doi: [10.1038/nrm3624](https://doi.org/10.1038/nrm3624) PMID: [23860236](https://pubmed.ncbi.nlm.nih.gov/23860236/); PubMed Central PMCID: PMCPMC4116690.
35. Kornberg LJ, Earp HS, Turner CE, Prockop C, Juliano RL. Signal transduction by integrins: increased protein tyrosine phosphorylation caused by clustering of beta 1 integrins. *Proc Natl Acad Sci U S A*. 1991; 88(19):8392–6. PMID: [1717976](https://pubmed.ncbi.nlm.nih.gov/1717976/); PubMed Central PMCID: PMCPMC52514.
36. Montanez E, Ussar S, Schifferer M, Bösl M, Zent R, Moser M, et al. Kindlin-2 controls bidirectional signaling of integrins. *Genes Dev*. 2008; 22(10):1325–30. doi: [10.1101/gad.469408](https://doi.org/10.1101/gad.469408) PMID: [18483218](https://pubmed.ncbi.nlm.nih.gov/18483218/); PubMed Central PMCID: PMCPMC2377186.
37. Shi X, Ma YQ, Tu Y, Chen K, Wu S, Fukuda K, et al. The MIG-2/integrin interaction strengthens cell-matrix adhesion and modulates cell motility. *J Biol Chem*. 2007; 282(28):20455–66. doi: [10.1074/jbc.M611680200](https://doi.org/10.1074/jbc.M611680200) PMID: [17513299](https://pubmed.ncbi.nlm.nih.gov/17513299/).
38. Ma YQ, Qin J, Wu C, Plow EF. Kindlin-2 (Mig-2): a co-activator of beta3 integrins. *J Cell Biol*. 2008; 181(3):439–46. doi: [10.1083/jcb.200710196](https://doi.org/10.1083/jcb.200710196) PMID: [18458155](https://pubmed.ncbi.nlm.nih.gov/18458155/); PubMed Central PMCID: PMCPMC2364684.
39. Huet-Calderwood C, Brahme NN, Kumar N, Stiegler AL, Raghavan S, Boggon TJ, et al. Differences in binding to the ILK complex determines kindlin isoform adhesion localization and integrin activation. *J Cell Sci*. 2014; 127(Pt 19):4308–21. doi: [10.1242/jcs.155879](https://doi.org/10.1242/jcs.155879) PMID: [25086068](https://pubmed.ncbi.nlm.nih.gov/25086068/); PubMed Central PMCID: PMCPMC4179494.
40. Shen B, Zhao X, O'Brien KA, Stojanovic-Terpo A, Delaney MK, Kim K, et al. A directional switch of integrin signalling and a new anti-thrombotic strategy. *Nature*. 2013; 503(7474):131–5. doi: [10.1038/nature12613](https://doi.org/10.1038/nature12613) PMID: [24162846](https://pubmed.ncbi.nlm.nih.gov/24162846/); PubMed Central PMCID: PMCPMC3823815.
41. Liu J, Fukuda K, Xu Z, Ma YQ, Hirbawi J, Mao X, et al. Structural basis of phosphoinositide binding to kindlin-2 protein pleckstrin homology domain in regulating integrin activation. *J Biol Chem*. 2011; 286(50):43334–42. doi: [10.1074/jbc.M111.295352](https://doi.org/10.1074/jbc.M111.295352) PMID: [22030399](https://pubmed.ncbi.nlm.nih.gov/22030399/); PubMed Central PMCID: PMCPMC3234820.
42. Bledzka K, Liu J, Xu Z, Perera HD, Yadav SP, Bialkowska K, et al. Spatial coordination of kindlin-2 with talin head domain in interaction with integrin beta cytoplasmic tails. *J Biol Chem*. 2012; 287(29):24585–94. Epub 2012/06/01. M111.336743 [pii] doi: [10.1074/jbc.M111.336743](https://doi.org/10.1074/jbc.M111.336743) PMID: [22648415](https://pubmed.ncbi.nlm.nih.gov/22648415/).
43. Fukuda K, Bledzka K, Yang J, Perera HD, Plow EF, Qin J. Molecular basis of kindlin-2 binding to integrin-linked kinase pseudokinase for regulating cell adhesion. *J Biol Chem*. 2014; 289(41):28363–75. doi: [10.1074/jbc.M114.596692](https://doi.org/10.1074/jbc.M114.596692) PMID: [25160619](https://pubmed.ncbi.nlm.nih.gov/25160619/); PubMed Central PMCID: PMCPMC4192489.
44. Kasirer-Friede A, Kang J, Kahner B, Ye F, Ginsberg MH, Shattil SJ. ADAP interactions with talin and kindlin promote platelet integrin alphaIIb beta3 activation and stable fibrinogen binding. *Blood*. 2014; 123(20):3156–65. doi: [10.1182/blood-2013-08-520627](https://doi.org/10.1182/blood-2013-08-520627) PMID: [24523237](https://pubmed.ncbi.nlm.nih.gov/24523237/); PubMed Central PMCID: PMCPMC4023421.
45. Rantala JK, Pouwels J, Pellinen T, Veltel S, Laasola P, Mattila E, et al. SHARPIN is an endogenous inhibitor of beta1-integrin activation. *Nat Cell Biol*. 2011; 13(11):1315–24. doi: [10.1038/ncb2340](https://doi.org/10.1038/ncb2340) PMID: [21947080](https://pubmed.ncbi.nlm.nih.gov/21947080/); PubMed Central PMCID: PMCPMC3257806.
